# Supplementary material for: Ferrocenyl benzimidazole with carboxylic and nitro anchors as potential sensitizers in dye-sensitized solar cells
Source: Royal Society of Chemistry journal article supplement (doi:10.1039/c7nj01464c), 2017-01-01
Supplement: c7nj01464c1.pdf [file c7nj01464c1.pdf]

## SUPPLEMENTARY INFORMATIONS

### Ferrocenyl Benzimidazole with Carboxylic and Nitro Anchors as Potential Sensitizers in Dye-Sensitized Solar Cells

Reena Yadav,<sup>a</sup> Amita Singh,<sup>a</sup> Gabriele Kociok-Köhn,<sup>b</sup> Ratna Chauhan,<sup>\*c</sup> Abhinav Kumar,<sup>\*a</sup> and Suresh Gosavi<sup>d</sup>

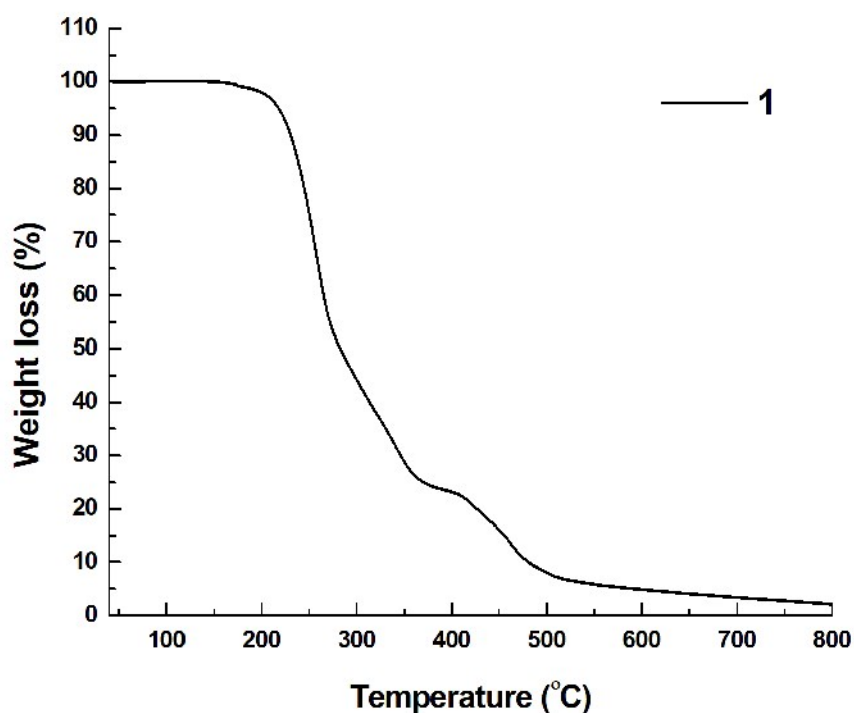

Fig. S1 TGA curve for 1.

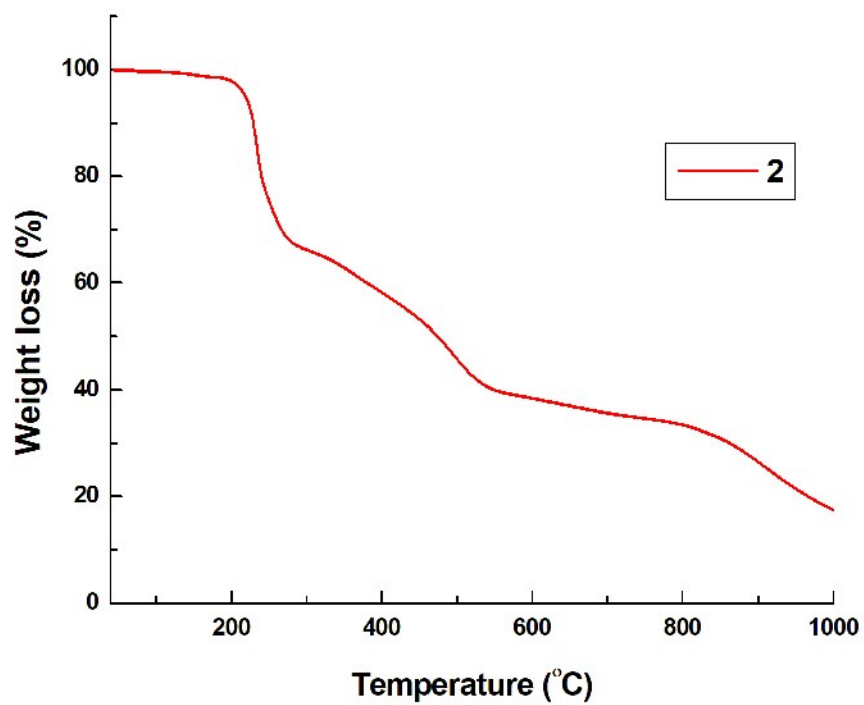

Fig. S2 TGA curve for 2.

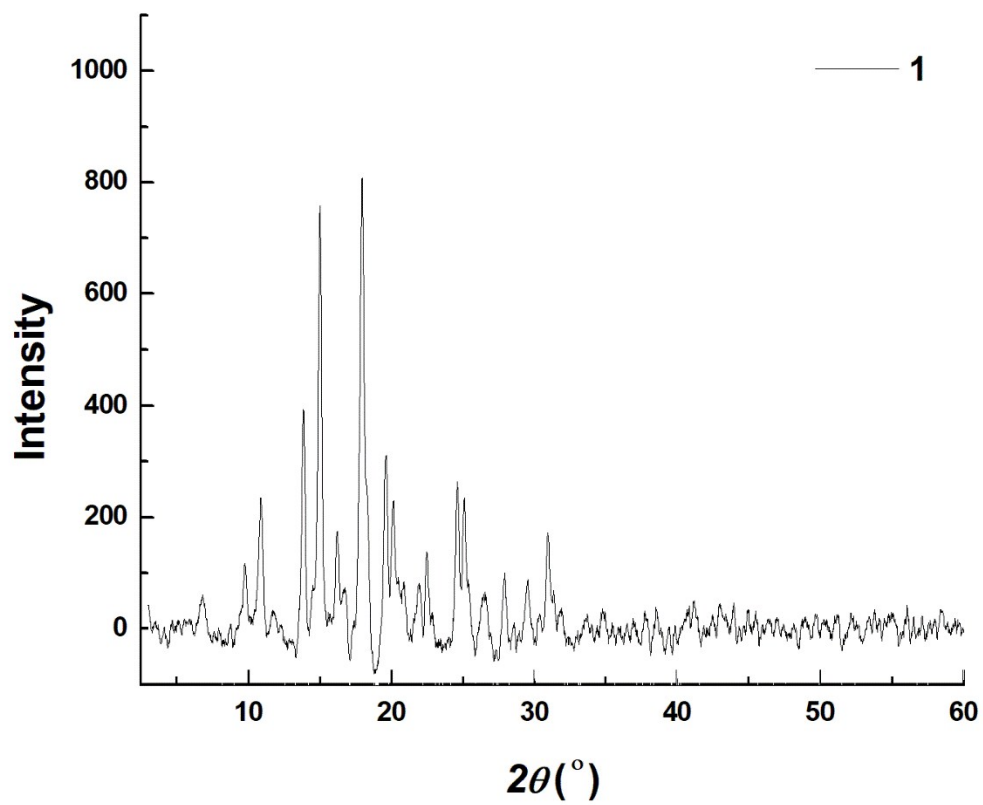

Fig. S3 pXRD pattern for 1.

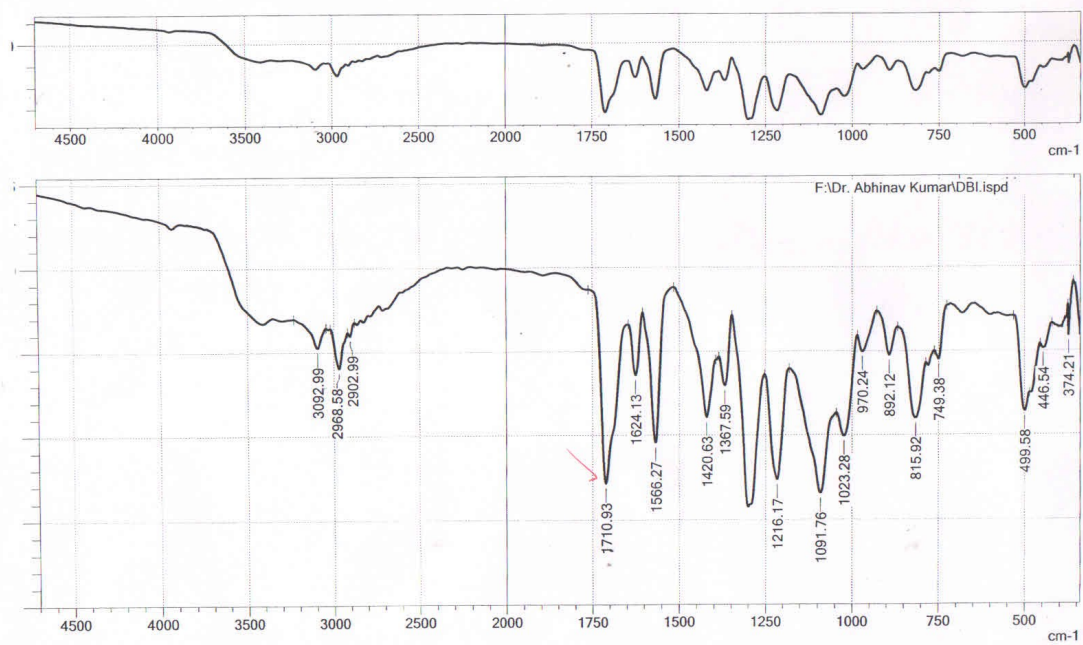

Fig. S4 IR spectrum of dye 1

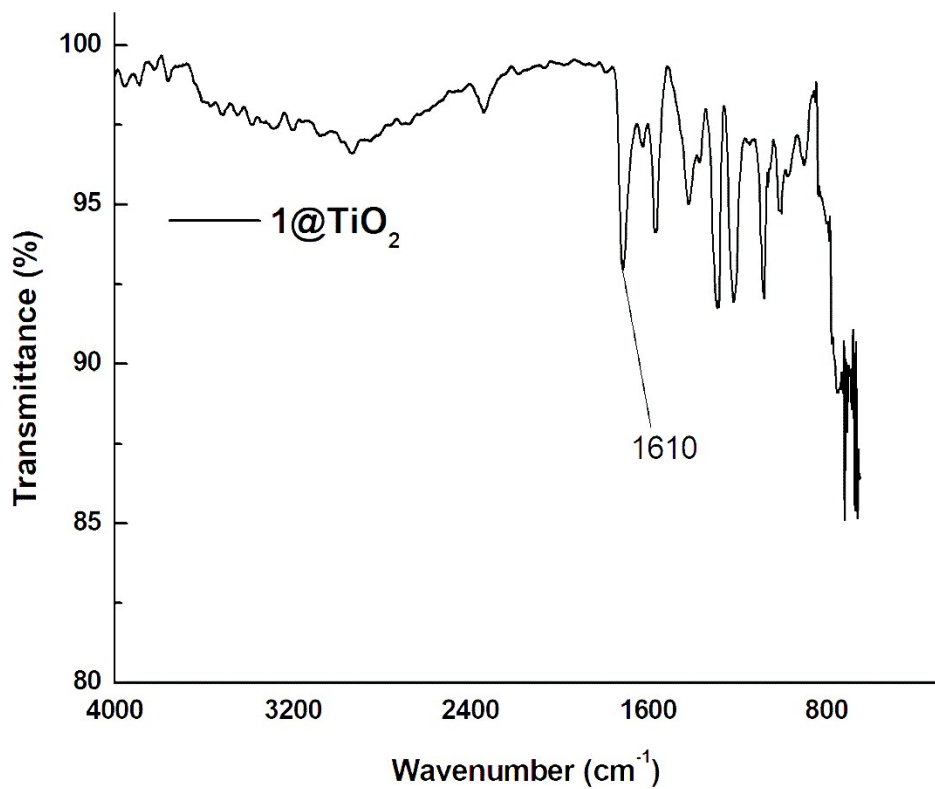

Fig. S5 IR spectrum of dye 1@TiO<sub>2</sub>

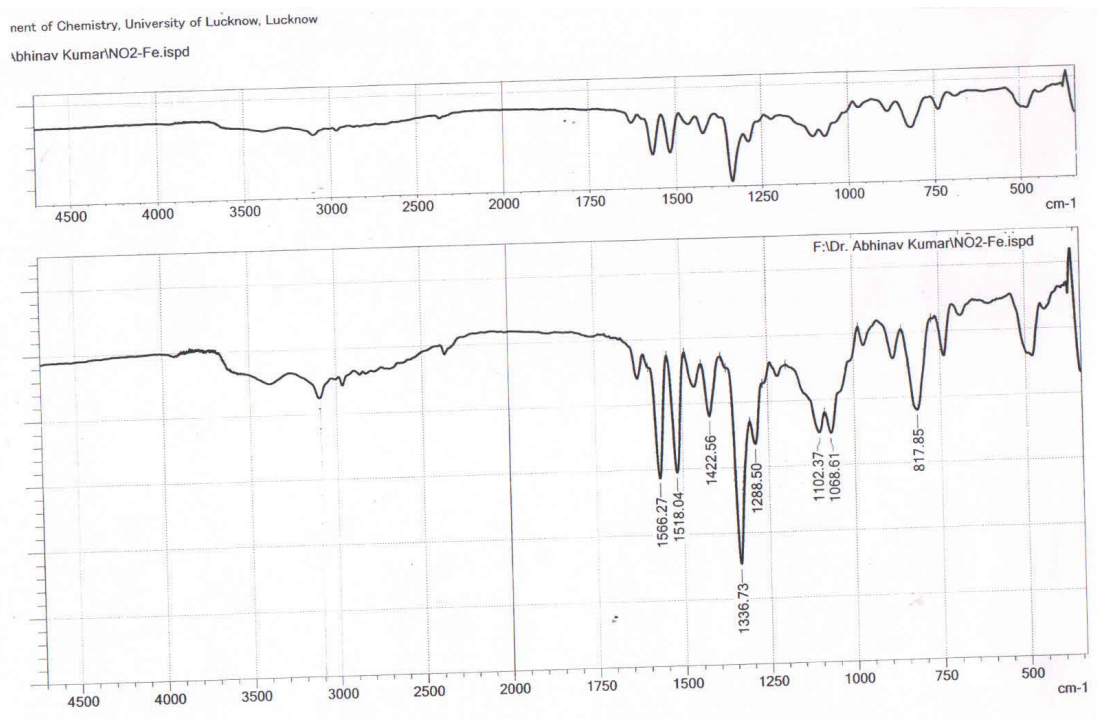

Fig. S6 IR spectrum of dye 2

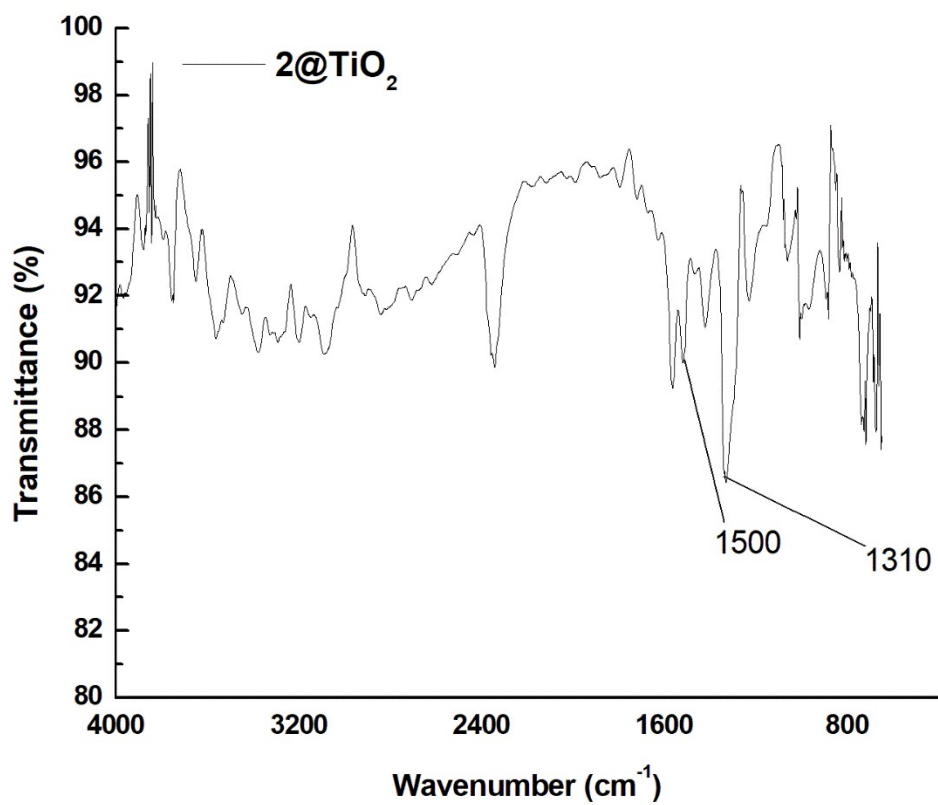

Fig. S7 IR spectrum of dye 2@TiO<sub>2</sub>
